# Supplementary material for: Gene-by-environment interactions in urban populations modulate risk phenotypes
Source: PubMed Central journal article supplement (PMC5840419; doi:10.1038/s41467-018-03202-2), 2018-03-06
Supplement: 41467_2018_3202_MOESM1_ESM.pdf [file 41467_2018_3202_MOESM1_ESM.pdf]

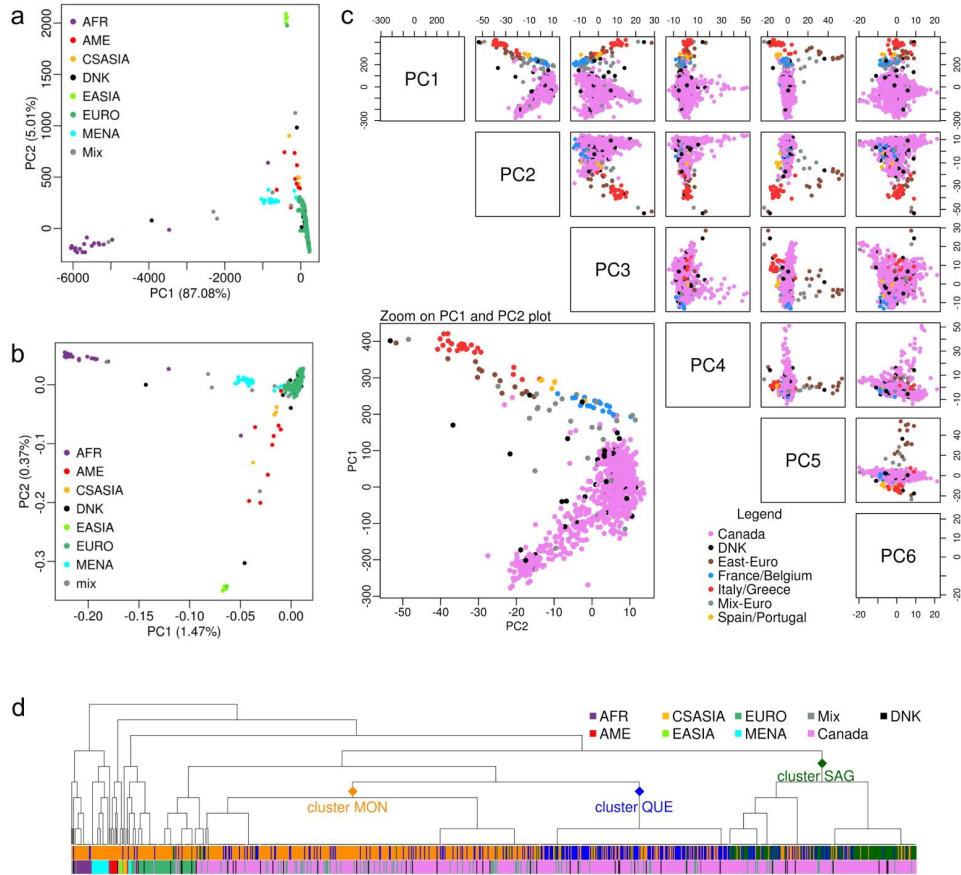

**Supplementary Figure 1: Genetic structure among participants selected from the CARTaGENE cohort.**

Principal component analyses on all participants, using (a) the chunk count matrix generated with ChromoPainter and (b) the LD pruned genotypes. All participants are colored according to the declared origin of the four grandparents. AFR Africa, AME America, CSASIA Central South Asia, DNK Do not know, EASIA East Asia, EURO Europe, MENA Middle East and North Africa, Mix Admixed individuals from different populations. (c) A principal component analysis on participants of European descent (French-Canadians and Europeans) on the chunkcount matrix of ChromoPainter reveals the genetic structuring present among the participants. Plots of the first six principal components, participants are colored according to the declared country of birth of the four grandparents. East-Euro includes Bulgaria, Germany, Hungary, Poland, Romania, Russia, and Ukraine. Mix-Euro indicates individuals with multiple declared countries of origin of the grandparents. (d) Tree from finSTRUCTURE highlights clusters of participants within Quebec, a structuring that is also revealed by the PCA shown in Fig. 1b and c. The first line below the tree indicates the region of residence of each participant (orange=MTL, blue=QUE, green=SAG). The second line indicates the declared ancestry of each participant.

a

PVCA estimation bar chart

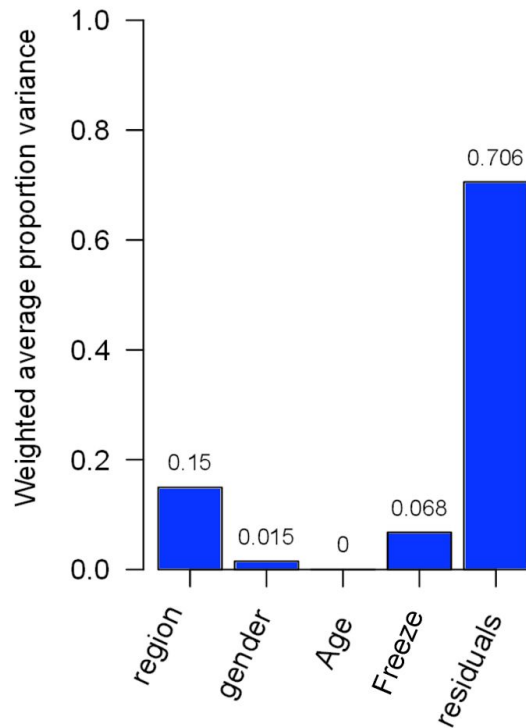

b

PVCA estimation bar chart

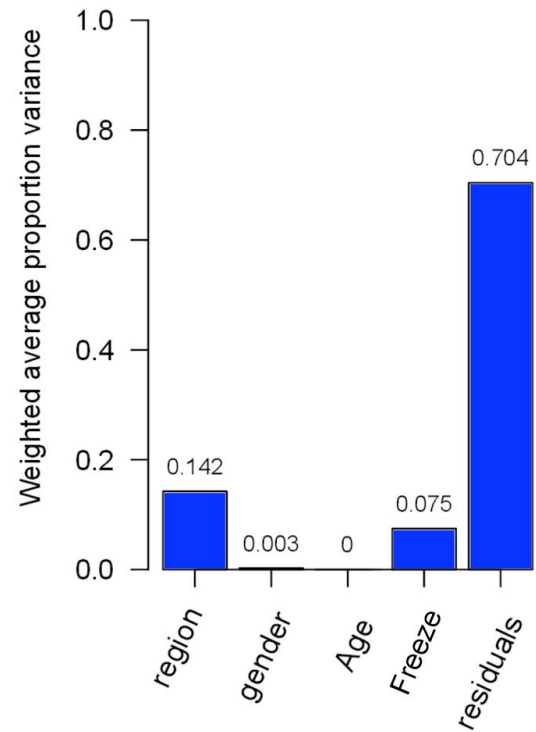**Supplementary Figure 2: PVCA for low level endophenotypes and region.**

Principal Variance Component Analysis for (a) French-Canadians and (b) Europeans. In both cases, region explains around 14-15% of the variation in gene expression profiles. “Freeze” (1 or 2) are the two different batches of sequencing, and also explains an amount of the variation, therefore, freeze will be added as a covariate in downstream analyses. Note that genes with strong sex-biased expression were filtered out at QC.

**a**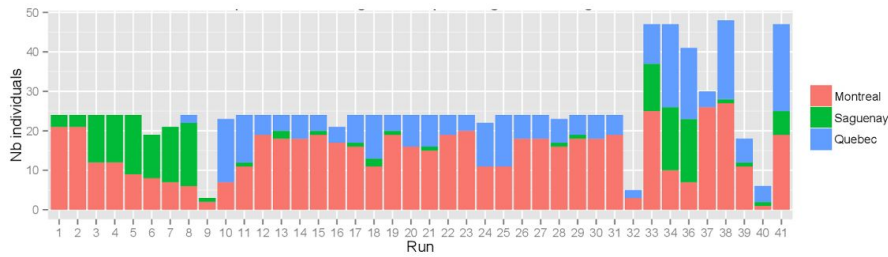**b**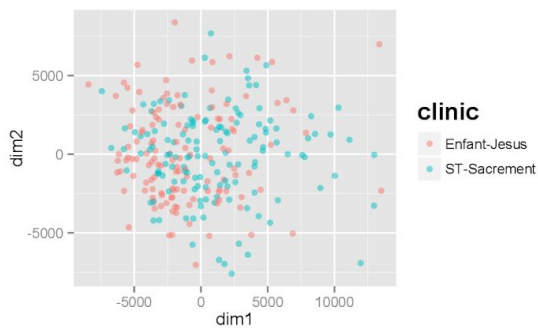**c**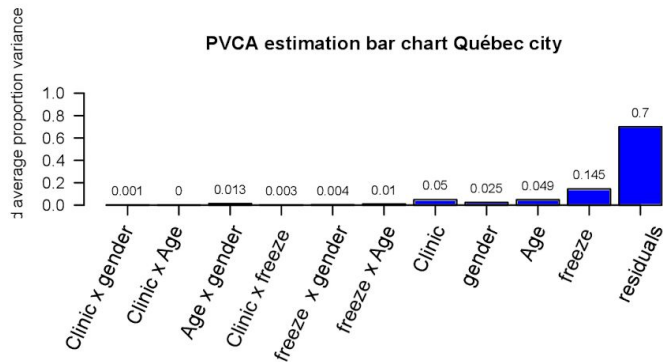

### Supplementary Figure 3: RNA-Seq experimental design and batch effect assessment.

(a) The distribution of individuals from the three regions among sequencing runs shows that participants from the three regions are largely uniformly distributed among sequencing runs. (b) PCA on participants living in QUE, but for which the blood collection was performed at two different clinics within QUE region (Enfant-Jesus and St-Sacrement). There is an absence of clustering by clinic, suggesting that the blood collection center does not affect gene expression profiles within a region. (c) Similarly, a PVCA on QUE individuals only shows that clinic does not explain a large amount of the variation in gene expression.

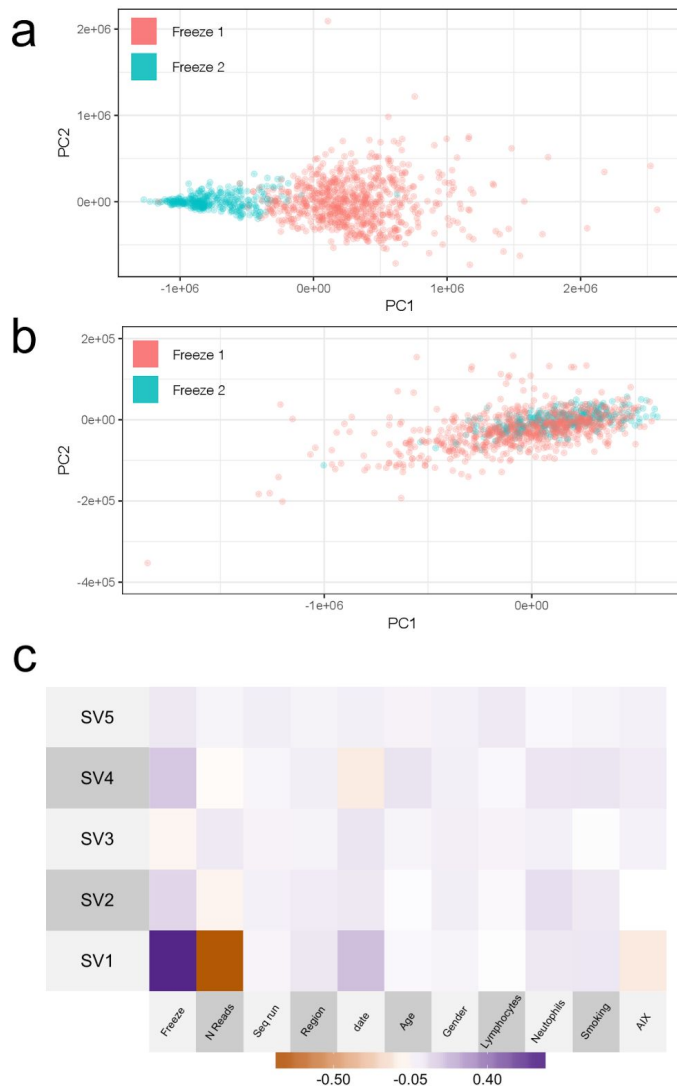

**Supplementary Figure 4: The effect of SVA correction on gene expression profiles.**

(a) In a principal component analysis (PCA) before correction, a very strong effect of the sequencing freeze can be observed across the dataset. (b) PCA after SVA correction (SVA 1 to 5 are the 5 surrogate variables). The effect of the Freeze is greatly reduced, although still significant (Supplementary Table 1). Other unwanted biological variation was removed by SVA (Supplementary Table 1). (c) Heatmap showing the correlation of SVA factors with several endophenotypes measured in our participants. SVA was performed to retain variation associated with region, and indeed as depicted in the heatmap, no surrogate variable show high correlation with region.

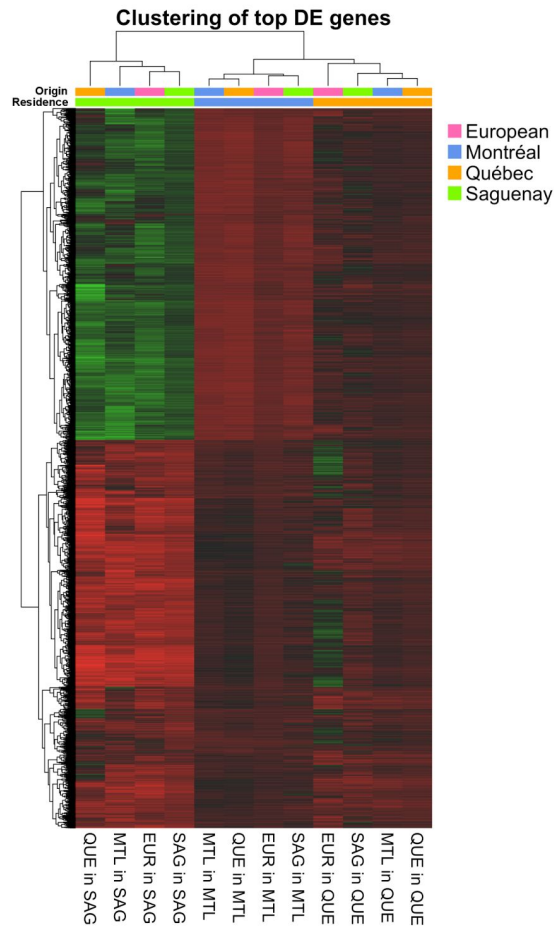

**Supplementary Figure 5: Expression profiles of participants cluster by environment of residence, not ancestry.**

Heatmap showing the k-means clustering of top differentially expressed genes between MTL and SAG (y-axis). The annotation at the top shows for each participant its origin (FC-regional or European), and the second one, its region of residence (environment). Participants cluster by region of residence, and not origin. We also see that participant living in MTL and QUE are more similar to each other in terms of their gene expression profiles, and that SAG participants are more divergent.

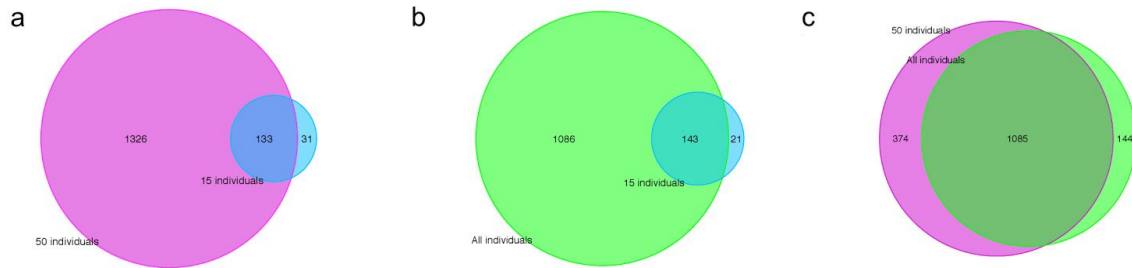

### Supplementary Figure 6: Power analysis of differential expression analyses.

We show that when comparing two groups (MTL and SAG) between which we expect to find many differentially expressed genes (DEGs), a smaller sample size of either  $n=15$  MTL vs 15 SAG or  $n=50$  MTL vs 50 SAG, still allows for the detection of some DEGs. We find large overlaps of DEGs identities between these power analyses comparisons, (a) between  $n=15$  and  $n=50$  analyses (b)  $n=15$  and all individuals (MTL=234, SAG=115), and (c) between  $n=50$  and all individuals. The largest gain in detection power of DEGs is achieved when increasing the sample size from 15 to 50. 78% of the DEGs detected with all individuals are also detected as DEGs when using  $n=50$  individuals.

## Reactome enrichment

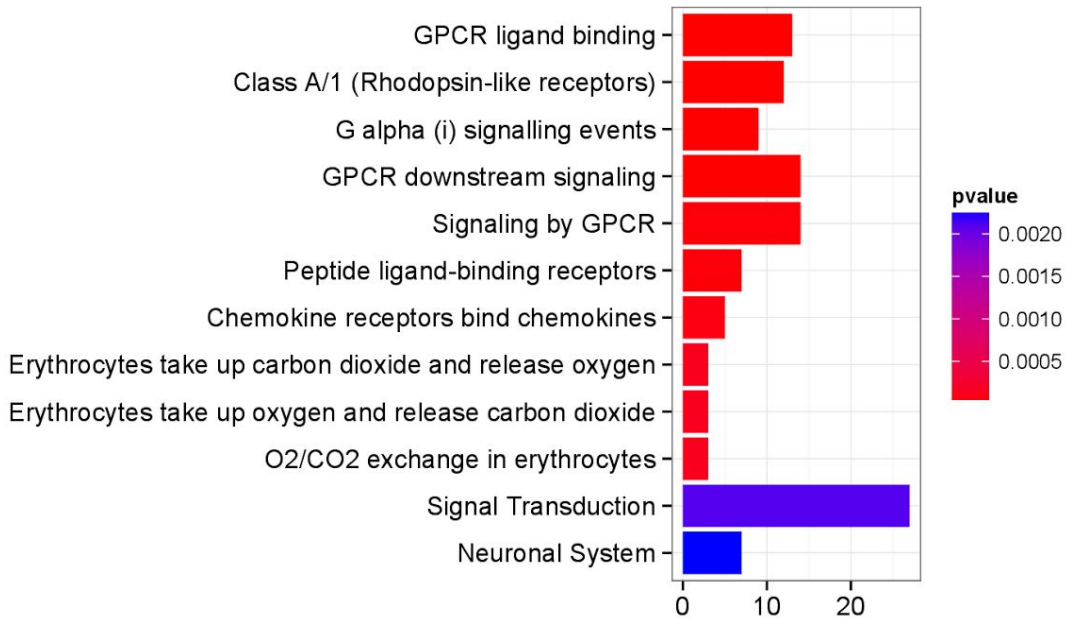

**Supplementary Figure 7: Gene ontology and Reactome enrichment from top hits of differentially expressed genes between Mtl-locals and Sag-locals.**

Reactome enrichment results. GO term enrichment are found in Supplementary Table 3. Gas and oxygen transport are found by both GO and reactome enrichments.

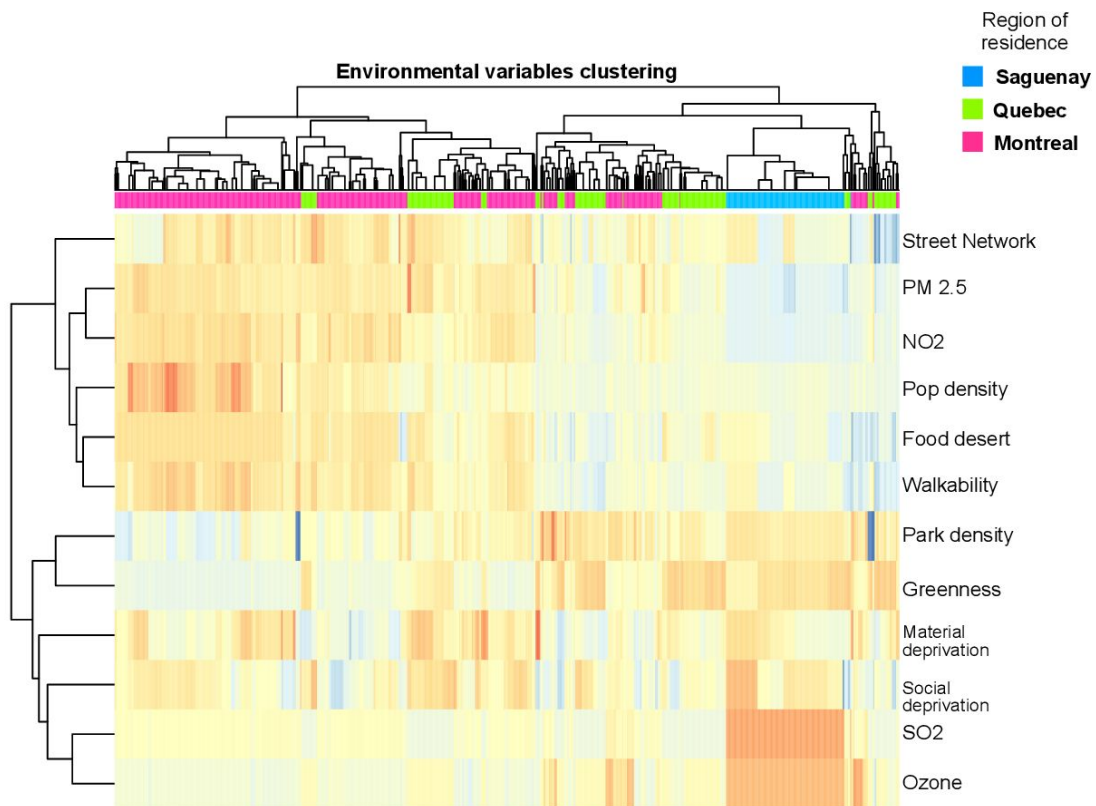

**Supplementary Figure 8: Environmental variation clustering across Quebec regions shows a unique environmental profile in Saguenay.**

Heatmap depicting the 12 environmental variables collated (rows) for each individual (columns). Clustering was performed on rows and columns, and the columns annotation indicates the region of residence of each individual. Saguenay individuals cluster all together, indicating a specific environmental exposure profile in Saguenay. More specifically, ozone, SO<sub>2</sub>, and NO<sub>2</sub> levels are important in defining the specific environmental exposure profile in Saguenay. These high ambient levels in Saguenay of ozone, SO<sub>2</sub> and NO<sub>2</sub> has been reported recurrently by national surveys <sup>1</sup> and non-profit organizations <sup>2</sup>.



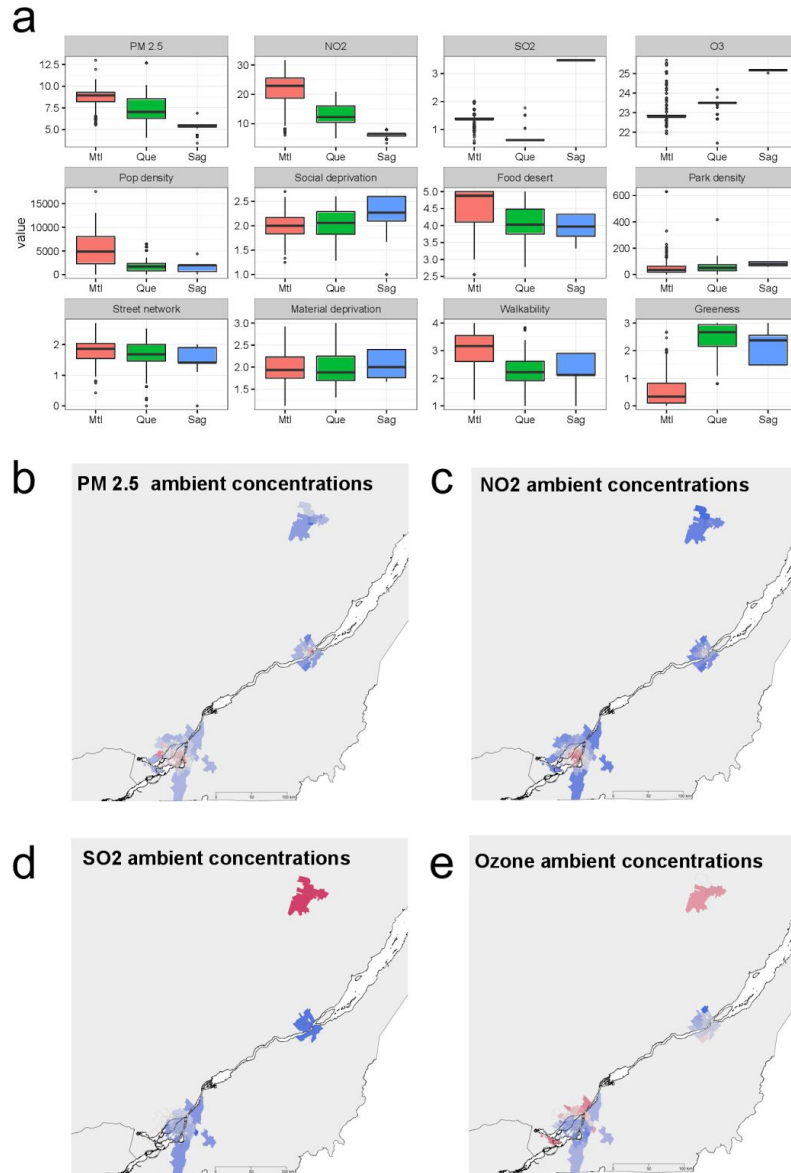

**Supplementary Figure 9: Environmental variation across Quebec regions.**

(a) Boxplots representing each of the environmental data for each of the three regions under study. Maps of ambient concentration across the three regions, per postal code district, of (c) SO<sub>2</sub>, (D) NO<sub>2</sub>, and (E) PM 2.5, illustrate large regional variation air composition. Color scheme represent the level of ambient concentration (parts per billion) for each pollutant (blue = lower levels, red = higher levels, see Supplementary Table 4 and material and methods for details on the data).

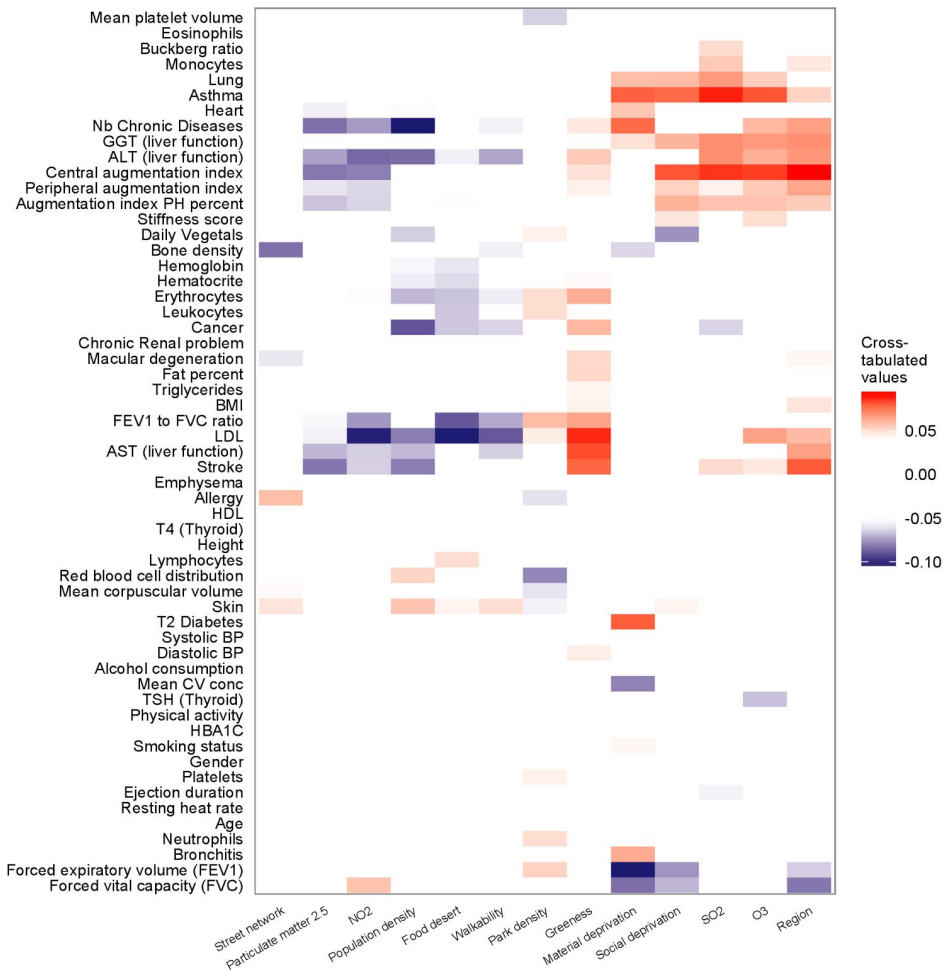

**Supplementary Figure 10: Coinertia analysis (CoIA) between 57 clinically relevant endophenotypes (rows) and environmental variables (columns).**

Heatmap representing the cross-tabulated values of 10 000 CoIAs based on resampling 493 individuals without replacement at each step. The median value for each endophenotype environment from the 10 000 CoIA is reported. The endophenotypes and environmental variables were clustered based on the cross-tabulated values. The environmental variable clustering largely reflect the environmental gradient across regions (Supplementary Figs 8 and 9). The strongest associations are observed between augmentation indexes (central, peripheral, and PH percent) and asthma with NO<sub>2</sub>, SO<sub>2</sub>, ozone, social deprivation, and region of residence. Liver function tests (ALT, AST, GGT) also show strong associations with several of these same environmental variables. Also, we find a negative association between FEV1 and FVC with region, with lower values of these spirometry measures in SAG. All biochemical endophenotypes were measured in a single central laboratory.

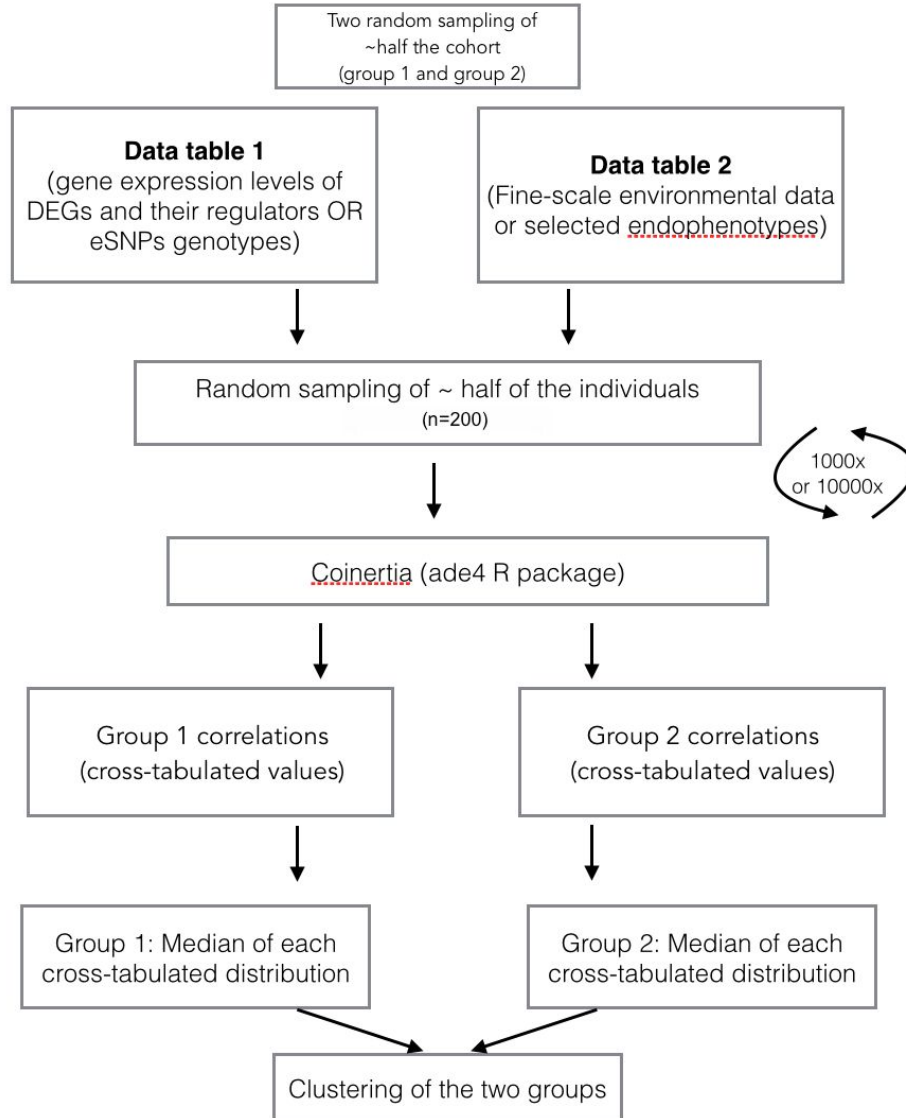

**Supplementary Figure 11: Coinertia analyses resampling scheme.**

We used this resampling scheme for (1) performing the CoIA between the differentially expressed genes plus their regulators and the fine-scale environmental variables (Fig. 3), and (2) the differentially expressed genes plus their regulators and the selected endophenotypes (Supplementary Fig. 12).

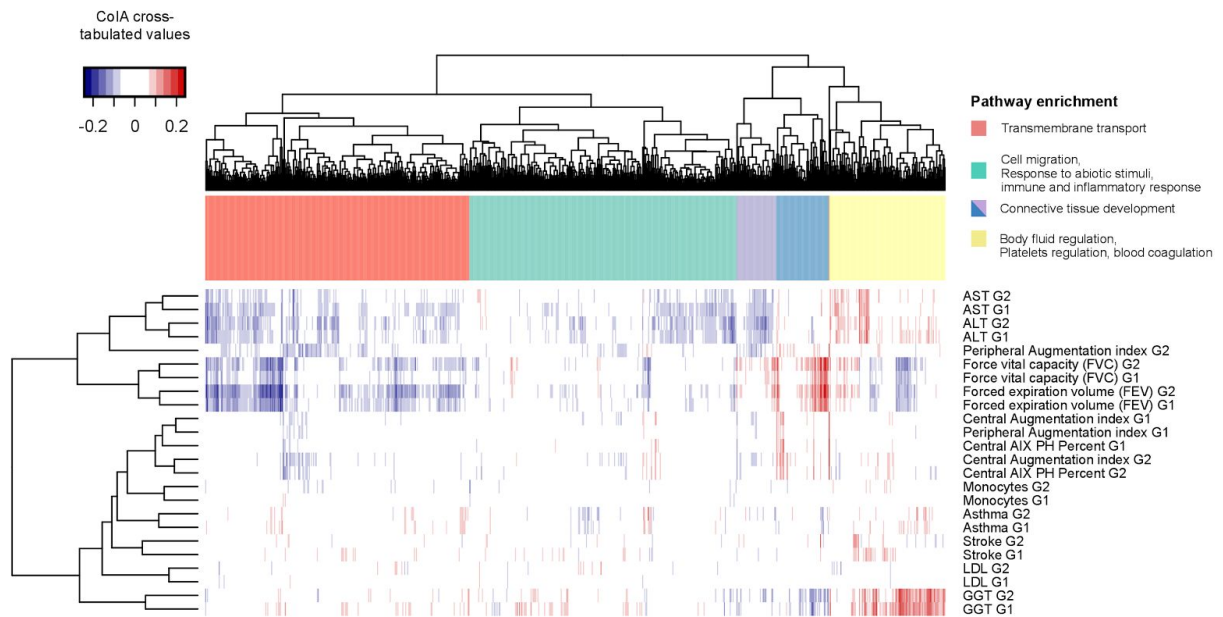

### Supplementary Figure 12: Coinertia between the differentially expressed genes plus their regulators (RDEGs) and the selected endophenotypes.

Coinertia (CoIA) analysis between gene expression (columns) and their associated endophenotypes (rows). Genes were selected based on their differential expression among regions, or if they regulate the differentially expressed genes. The endophenotypes were the most associated with regional and fine scale environmental variables (Supplementary Fig. 8 and 9). Two sets of 500 of CoIAs were computed independently between gene expression and endophenotypes (Supplementary Fig. 11). The group 1 or 2 (G1 or G2) represents the freeze number 1 or 2, respectively. For each G1 or G2 a total of 1000 resampling of 493 individuals (without replacement) from the total population ( $n=997$ ), were performed. The heatmap represents for each G1 or G2 the median of each endophenotype-gene association from the cross-tabulated values distribution. Phenotypes-expression associations from G1 and G2 largely cluster together, indicating a common signature of association. Detailed pathway enrichment results are given on Supplementary Fig. 13.

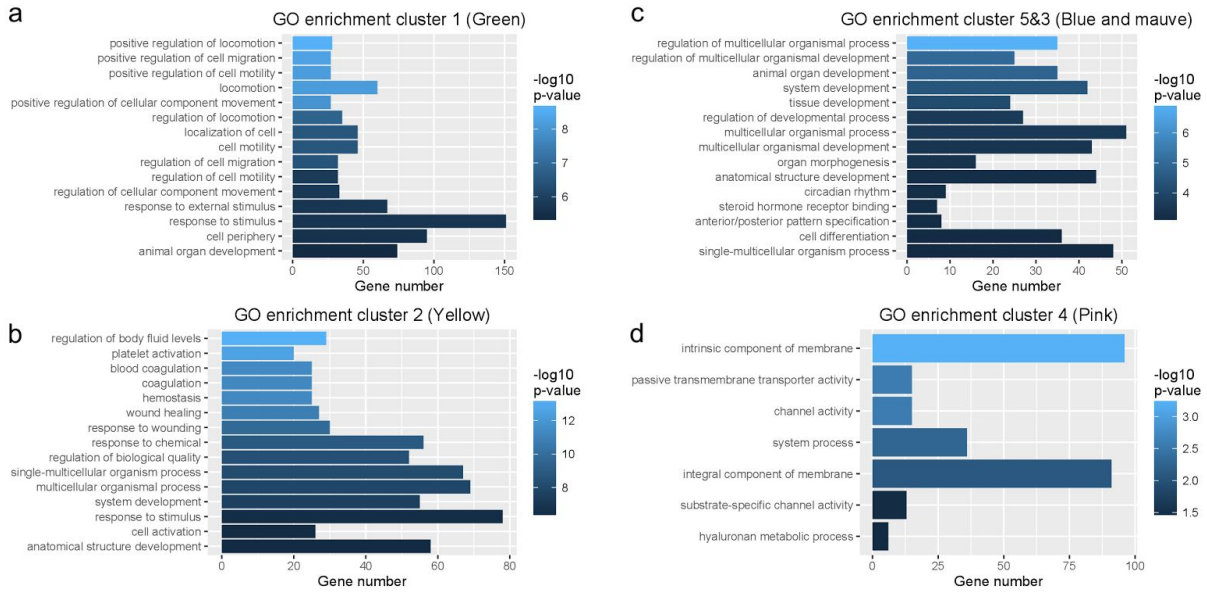

**Supplementary Figure 13: Pathway enrichment from GO terms in gene clusters from CoIA between endophenotypes and differentially expressed genes (Fig. 3c).**

Top 15 enriched terms are shown for each gene cluster identified by color annotation on columns of Supplementary Fig. 12. (a) Green cluster: enrichment for cell migration, immune and inflammatory response and response to abiotic stimuli. (b) Yellow cluster: enrichment in body fluid regulation, platelets regulation, and blood coagulation. (c) Blue and mauve cluster were analyzed together because of their close clustering. Enrichment in connective tissue development (d) Pink cluster: enrichment in transmembrane transport and channel activity.

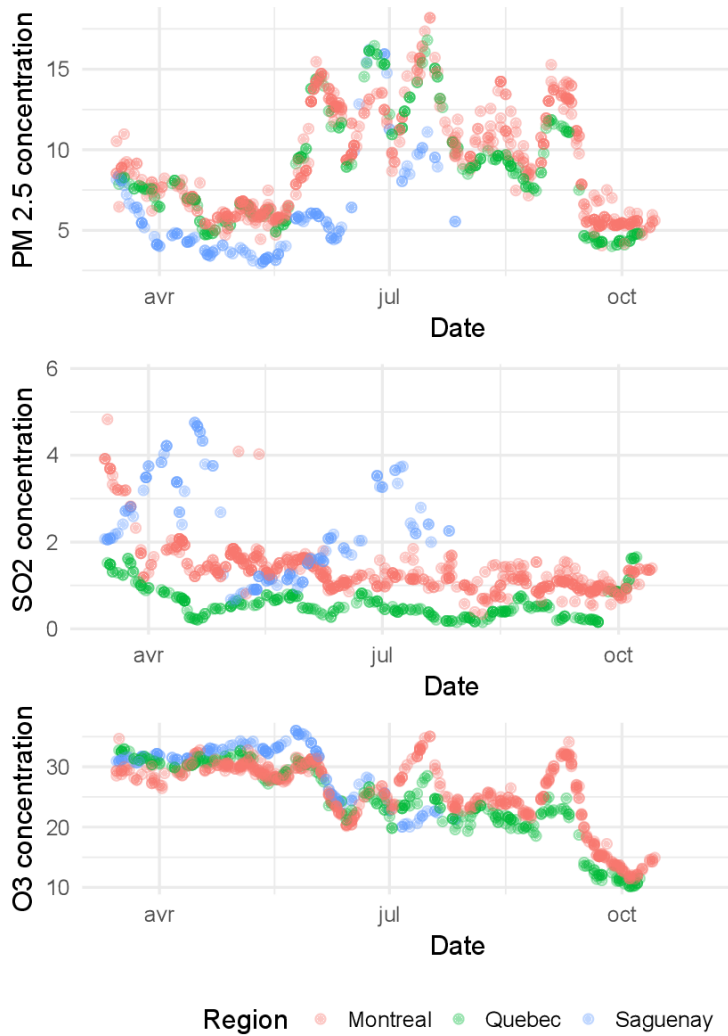

**Supplementary Figure 14:** Pollutant exposure for each CaG participant, 14-day average prior of day of blood sampling.

PM2.5, SO2 and O3 daily ambient levels (parts per billion) measured in each FSA were averaged for a 14-day period prior of blood sampling for each individual.

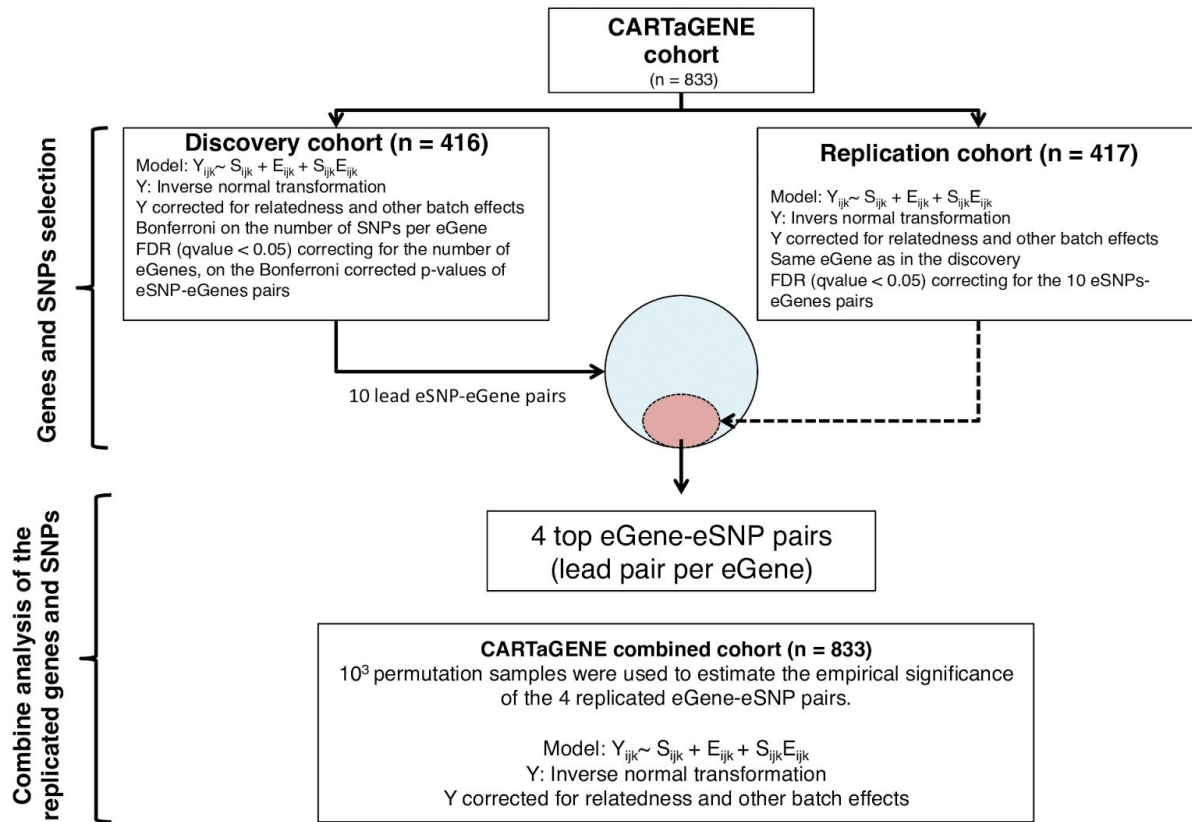

**Supplementary Figure 15: Design and resampling scheme for env-eQTL analyses.**

Pipeline to identify eQTLs for which the effect size is modulated by exposure with one of four ambient air pollutants (env-eQTLs): PM2.5, NO2, O3, and SO2. We retained the four eGene-eSNP pairs that replicated between the discovery and replication cohorts (with the same direction of effect), and assessed the empirical significance by generating 10<sup>3</sup> permutation samples from the combined cohort (details in the material and methods).

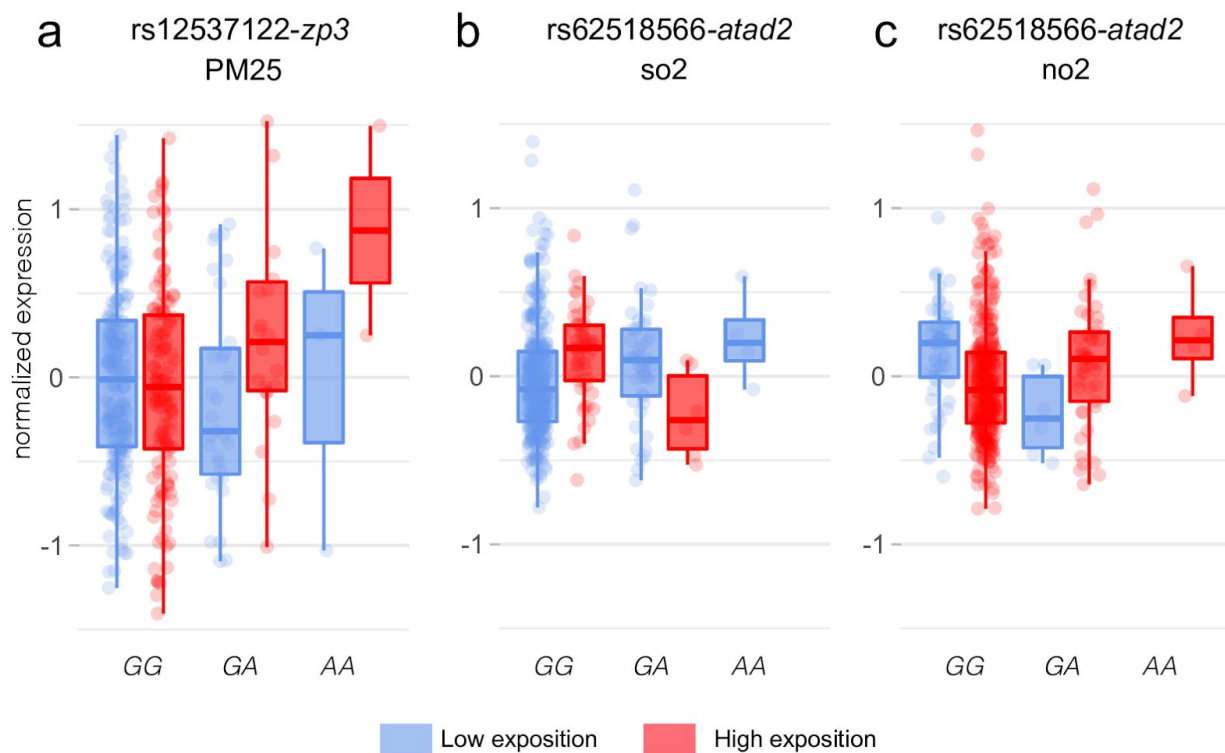

### Supplementary Figure 16: Gene-environment interactions.

Top significant gene-environment interactions detected in CARTaGENE, represented as interaction graphs of env-eQTLs for the whole cohort. Red points (and boxplots) represent individuals exposed to a high level of the pollutant indicated in the title of each graph, and blue, represent low exposition to the pollutant. Genotype status of the eSNP is depicted on the x-axis and normalized expression of the eGene on the y-axis. (a) *zp3* expression is modulated by eSNP rs12537122 and PM2.5: ZP3 is a glycoprotein that has been linked to parkinson disease <sup>3</sup>. (b) *atad2* expression is modulated by eSNP rs62518566 and so2 and (c) no2. Interestingly, ATAD2 protein regulates chromatin dynamics and acts as a co-activator of estrogen and androgen receptors. It has been found that *atad2* is a marker of poor prognosis in a variety of different cancers <sup>4,5</sup>. The upper whiskers extend from the 3rd quartile to the largest value no further than 1.5 \* inter-quartile range from the 3rd quartile. The lower whiskers extend from the first quartile to the smallest value at most 1.5 \* inter-quartile range from the first quartile.



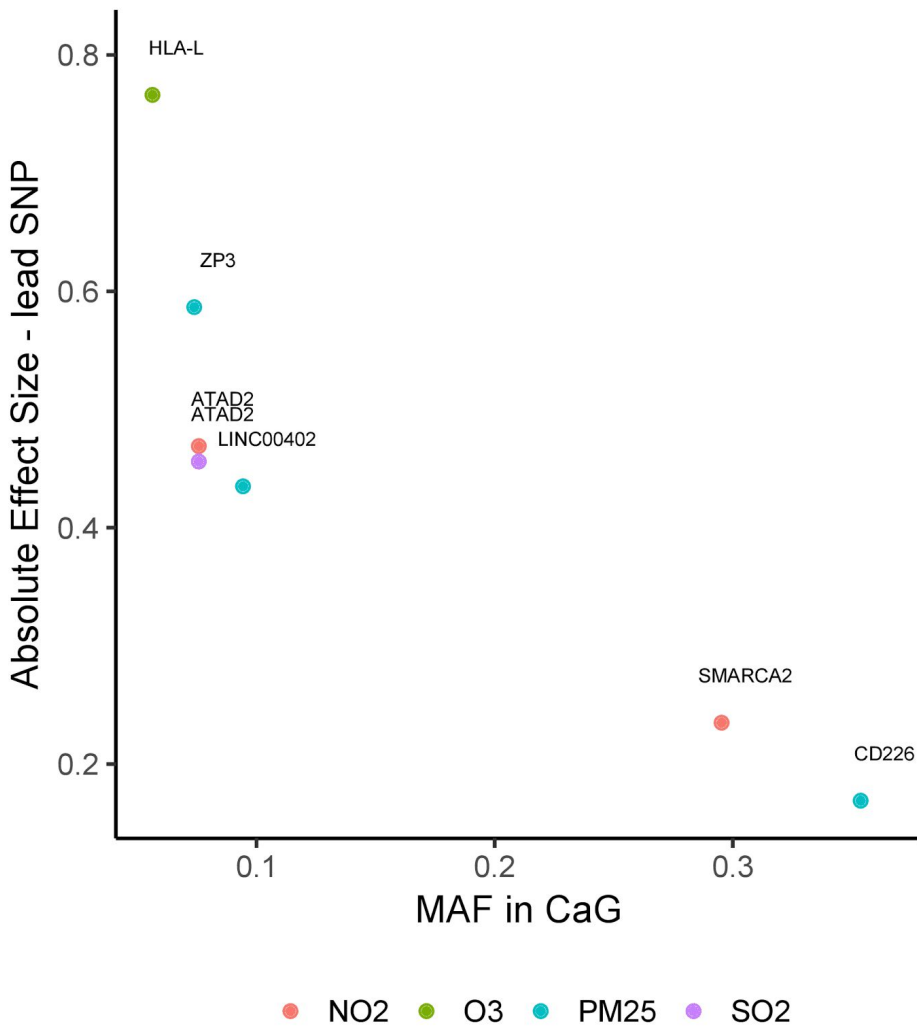

**Figure S17: env-eQTL Effect sizes are larger for alleles with lower MAF**

Relationship between MAF and effect sizes for env-eQTLs, for lead eSNPs. We observe an inverse relationship between absolute effect size and MAF. Extremes of gene expression in humans have been shown to associate with lower MAF <sup>6</sup> and burden of rare variants in cis-regulatory regions <sup>7</sup>. This is consistent with the hypothesis that transcript abundance is under stabilizing selection.

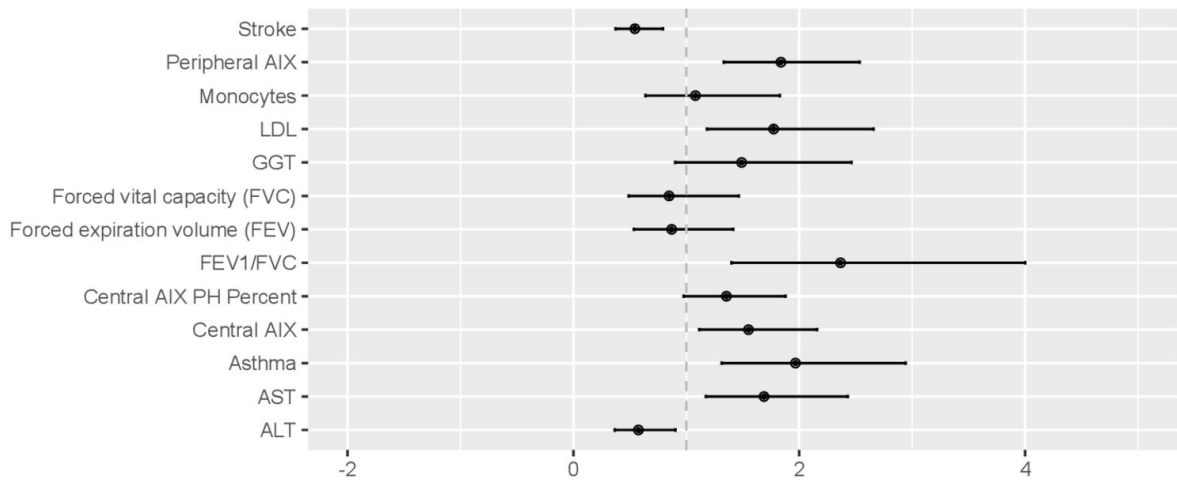

Odd ratios of env-eQTL less common variants ( $0.05 < \text{MAF} < 0.1$ ) showing cross-tabulated values ( $>0.01$ ) with selected endophenotypes

**Supplementary Figure 18: Less common env-eQTL eSNPs are enriched for strong associations with endophenotypes**

The odds ratio of observing less common variants (compared to common) for stronger endophenotypic associations is above 1 for FEV1/FVC ratio, central and peripheral AIX, Asthma, LDL and AST. We performed the CoIA analysis between all eSNPs (SNPs in cis of significant eGenes) and selected endophenotypic traits. The MAF was estimated from the data in the cohort, and we classified the SNPs as common ( $\text{MAF} > 0.1$ ), and less common ( $\text{MAF}$  between 0.05 and 0.1). The 95% confidence intervals are depicted for each trait.

## Supplementary tables

**Supplementary Table 1: SVA correction removes most unwanted variation in gene expression profiles.** Significant variables after a stepwise regression on expression profiles PC1 and PC2. Freeze 1 and Freeze 2 show a significant contribution of arterial stiffness, neutrophils counts, and Region to variation. Combining Freeze 1 and Freeze 2 together also show the same variables as significant, in addition to the Freeze. Once the total data has been corrected with SVA (n SVA=5) with specifically retaining the variation associated with region, the stepwise regression recovers region and Freeze as significant variables. Other biological variation that was significant before the SVA correction (Arterial Stiffness and neutrophils) has been efficiently removed. Freeze remains significant, and will be accounted for as a covariate in all subsequent analyses. The number of asterisks reflects the significance level of each variable in the stepwise regression. \*= $p < 0.05$ , \*\*= $p < 0.01$ , \*\*\*= $p < 0.001$ , \*\*\*\*= $p < 0.0001$ , \*\*\*\*\*= $p < 2.2 \times 10^{-16}$

|     | Freeze 1                          | Freeze 2                                                  | Freeze 1 and 2                                            | SVA corrected -<br>with variation<br>around <i>Region</i><br>retained |
|-----|-----------------------------------|-----------------------------------------------------------|-----------------------------------------------------------|-----------------------------------------------------------------------|
| PC1 | Stiffness**<br>Neutrophil counts* | Region*****                                               | Freeze***<br>Region**<br>Neutrophil counts*<br>Stiffness* | Region***<br>Freeze**                                                 |
| PC2 | Region***                         | Region***<br>Lymphocyte counts***<br>Neutrophil counts*** | Region***<br>Freeze**                                     | Region***<br>Freeze**                                                 |

**Supplementary Table 2: Distribution of locals and migrants across regions.**

We identified the continental origin (French-Canadian or European) of each participant by combining the results of the principal component analysis on genotypes together with the self-reported origin of the grandparents. The regional ancestry of FC was determined based on the tree built from the chunk count matrix of chromopainter output.

| Origin              | Residence     |               |               |
|---------------------|---------------|---------------|---------------|
|                     | Living in Mtl | Living in Que | Living in Sag |
| region or continent |               |               |               |
| FC-Montreal         | 234           | 58            | 6             |
| FC-Quebec           | 61            | 115           | 5             |
| FC-Saguenay         | 34            | 41            | 115           |
| European            | 108           | 16            | 12            |

**Supplementary Table 3: Top differentially expressed genes between Mtl and Sag are enriched in oxygen, gas transport, Gpcr, and inflammatory response.**

We performed a GO term enrichment on the top differentially expressed genes between Mtl and Sag (lfc > 0.65 and p-value < 0.05/15632, n=460).

| GO ID      | GO term                                                                 | p-value  |
|------------|-------------------------------------------------------------------------|----------|
| GO:0015671 | oxygen transport                                                        | 1.90E-07 |
| GO:0015669 | gas transport                                                           | 3.40E-07 |
| GO:0007267 | cell-cell signaling                                                     | 1.20E-06 |
| GO:0007186 | G-protein coupled receptor signaling pathway                            | 1.30E-05 |
| GO:0044057 | regulation of system process                                            | 1.70E-05 |
| GO:0006937 | regulation of muscle contraction                                        | 3.20E-05 |
| GO:0006954 | inflammatory response                                                   | 3.40E-05 |
| GO:0006811 | ion transport                                                           | 0.00017  |
| GO:0090257 | regulation of muscle system process                                     | 0.00017  |
| GO:0070588 | calcium ion transmembrane transport                                     | 0.00018  |
| GO:0048673 | collateral sprouting of intact axon in response to injury               | 0.00023  |
| GO:0048683 | regulation of collateral sprouting of intact axon in response to injury | 0.00023  |
| GO:0051480 | cytosolic calcium ion homeostasis                                       | 0.00028  |
| GO:0098655 | cation transmembrane transport                                          | 0.00029  |
| GO:0034220 | ion transmembrane transport                                             | 0.00036  |
| GO:0055085 | transmembrane transport                                                 | 0.00039  |
| GO:0098660 | inorganic ion transmembrane transport                                   | 0.0005   |
| GO:0044707 | single-multicellular organism process                                   | 0.00054  |
| GO:0006874 | cellular calcium ion homeostasis                                        | 0.0006   |
| GO:0006942 | regulation of striated muscle contraction                               | 0.00066  |
| GO:0055074 | calcium ion homeostasis                                                 | 0.00077  |

|            |                                                            |         |
|------------|------------------------------------------------------------|---------|
| GO:0042044 | fluid transport                                            | 0.00082 |
| GO:0032501 | multicellular organismal process                           | 0.00084 |
| GO:0006935 | chemotaxis                                                 | 0.00095 |
| GO:0042330 | taxis                                                      | 0.00095 |
| GO:0072503 | cellular divalent inorganic cation homeostasis             | 0.00098 |
| GO:0007268 | synaptic transmission                                      | 0.00102 |
| GO:0034765 | regulation of ion transmembrane transport                  | 0.00112 |
| GO:0006941 | striated muscle contraction                                | 0.00123 |
| GO:0006936 | muscle contraction                                         | 0.00126 |
| GO:0060326 | cell chemotaxis                                            | 0.00127 |
| GO:0033280 | response to vitamin D                                      | 0.00141 |
| GO:0072507 | divalent inorganic cation homeostasis                      | 0.00141 |
| GO:0034762 | regulation of transmembrane transport                      | 0.00161 |
| GO:0098662 | inorganic cation transmembrane transport                   | 0.00174 |
| GO:0040011 | locomotion                                                 | 0.00202 |
| GO:0031102 | neuron projection regeneration                             | 0.00206 |
| GO:0003008 | system process                                             | 0.00206 |
| GO:0042476 | odontogenesis                                              | 0.00221 |
| GO:0031282 | regulation of guanylate cyclase activity                   | 0.00227 |
| GO:0045933 | positive regulation of muscle contraction                  | 0.00244 |
| GO:0015701 | bicarbonate transport                                      | 0.00286 |
| GO:0052652 | cyclic purine nucleotide metabolic process                 | 0.00314 |
| GO:0009190 | cyclic nucleotide biosynthetic process                     | 0.00336 |
| GO:0007168 | receptor guanylyl cyclase signaling pathway                | 0.00337 |
| GO:0014819 | regulation of skeletal muscle contraction                  | 0.00337 |
| GO:0030826 | regulation of cGMP biosynthetic process                    | 0.00337 |
| GO:0007204 | positive regulation of cytosolic calcium ion concentration | 0.00384 |
| GO:0030049 | muscle filament sliding                                    | 0.00384 |
| GO:0033275 | actin-myosin filament sliding                              | 0.00384 |

---

## Supplementary Table 4

| Variable                                                                                                                                 | Data source                                                                                                                                                                                                                                                                                                                                                                                                                                                                                                                                                                             |
|------------------------------------------------------------------------------------------------------------------------------------------|-----------------------------------------------------------------------------------------------------------------------------------------------------------------------------------------------------------------------------------------------------------------------------------------------------------------------------------------------------------------------------------------------------------------------------------------------------------------------------------------------------------------------------------------------------------------------------------------|
| <b>Air pollution</b>                                                                                                                     |                                                                                                                                                                                                                                                                                                                                                                                                                                                                                                                                                                                         |
| 14 day SO <sub>2</sub> community levels (ppb): average concentration measured at NAPS stations ≤25 km from FSA centroid                  | Canadian National Air Pollutant Surveillance Network (NAPS) : <a href="http://www.ec.gc.ca/rnspa-naps/default.asp?lang=En&amp;n=5COD33CF">http://www.ec.gc.ca/rnspa-naps/default.asp?lang=En&amp;n=5COD33CF</a>                                                                                                                                                                                                                                                                                                                                                                         |
| 14 day O <sub>3</sub> community levels (ppb): average concentration measured at NAPS stations ≤25 km from FSA centroid                   | Canadian National Air Pollutant Surveillance Network (NAPS) : <a href="http://www.ec.gc.ca/rnspa-naps/default.asp?lang=En&amp;n=5COD33CF">http://www.ec.gc.ca/rnspa-naps/default.asp?lang=En&amp;n=5COD33CF</a>                                                                                                                                                                                                                                                                                                                                                                         |
| 14 day PM <sub>2.5</sub> community levels (µg/m <sup>3</sup> ): average concentration measured at NAPS stations ≤25 km from FSA centroid | Canadian National Air Pollutant Surveillance Network (NAPS) : <a href="http://www.ec.gc.ca/rnspa-naps/default.asp?lang=En&amp;n=5COD33CF">http://www.ec.gc.ca/rnspa-naps/default.asp?lang=En&amp;n=5COD33CF</a>                                                                                                                                                                                                                                                                                                                                                                         |
| Annual fine scale NO <sub>2</sub> levels (ppb): model resolution ≤1 km                                                                   | Satellite-LUR with empirical adjustment: Hystad et al. 2011 ( <a href="https://ehp.niehs.nih.gov/1002976">https://ehp.niehs.nih.gov/1002976</a> ).                                                                                                                                                                                                                                                                                                                                                                                                                                      |
| Annual fine scale PM <sub>2.5</sub> levels (µg/m <sup>3</sup> ): model resolution ≤1 km                                                  | Geographically weighted satellite-LUR: Van Donkelaar et al. 2015 ( <a href="http://pubs.acs.org/doi/abs/10.1021/acs.est.5b02076">http://pubs.acs.org/doi/abs/10.1021/acs.est.5b02076</a> )<br>Van Donkelaar e al. 2010 ( <a href="https://ehp.niehs.nih.gov/0901623/">https://ehp.niehs.nih.gov/0901623/</a> )                                                                                                                                                                                                                                                                          |
|                                                                                                                                          | data available at :<br><a href="http://fizz.phys.dal.ca/~atmos/martin/?page_id=140">http://fizz.phys.dal.ca/~atmos/martin/?page_id=140</a>                                                                                                                                                                                                                                                                                                                                                                                                                                              |
| <b>Built environment</b>                                                                                                                 |                                                                                                                                                                                                                                                                                                                                                                                                                                                                                                                                                                                         |
| Street network                                                                                                                           | <a href="https://www.inspq.qc.ca/expertises/habitudes-de-vie-et-prevention-des-maladies-chroniques/nutrition-activite-physique-et-problemes-lies-au-poids/portrait-de-l-environnement-bati-et-de-l-environnement-des-services/indicateurs-de-l-environnement-bati/connexite-du-reseau-routier">https://www.inspq.qc.ca/expertises/habitudes-de-vie-et-prevention-des-maladies-chroniques/nutrition-activite-physique-et-problemes-lies-au-poids/portrait-de-l-environnement-bati-et-de-l-environnement-des-services/indicateurs-de-l-environnement-bati/connexite-du-reseau-routier</a> |
| Population density                                                                                                                       | <a href="https://www.inspq.qc.ca/expertises/habitudes-de-vie-et-prevention-des-maladies-chroniques/nutrition-activite-physique-et-problemes-lies-au-poids/portrait-de-l-environnement-bati-et-de-l-environnement-des-services/indicateurs-de-l-environnement-bati/densite-residentielle">https://www.inspq.qc.ca/expertises/habitudes-de-vie-et-prevention-des-maladies-chroniques/nutrition-activite-physique-et-problemes-lies-au-poids/portrait-de-l-environnement-bati-et-de-l-environnement-des-services/indicateurs-de-l-environnement-bati/densite-residentielle</a>             |

Food desert <https://www.inspq.qc.ca/expertises/habitudes-de-vie-et-prevention-des-maladies-chroniques/nutrition-activite-physique-et-problemes-lies-au-poids/portrait-de-l-environnement-bati-et-de-l-environnement-des-services/environnement-des-services/indice-de-l-environnement-alimentaire>

Park density (number of parks by area) <https://www.inspq.qc.ca/expertises/habitudes-de-vie-et-prevention-des-maladies-chroniques/nutrition-activite-physique-et-problemes-lies-au-poids/portrait-de-l-environnement-bati-et-de-l-environnement-des-services/environnement-des-services/mesure-de-distance-parks-et-espaces>

Greenness <https://www.inspq.qc.ca/expertises/habitudes-de-vie-et-prevention-des-maladies-chroniques/nutrition-activite-physique-et-problemes-lies-au-poids/portrait-de-l-environnement-bati-et-de-l-environnement-des-services/indicateurs-de-l-environnement-bati/design-de-l-environnement>

Walkability <https://www.inspq.qc.ca/expertises/habitudes-de-vie-et-prevention-des-maladies-chroniques/nutrition-activite-physique-et-problemes-lies-au-poids/portrait-de-l-environnement-bati-et-de-l-environnement-des-services/indicateurs-de-l-environnement-bati/indice-de-potential-pietonnier>

---

**Socioeconomic status (SES)**

Social and material deprivation indexes <https://www.inspq.qc.ca/expertises/habitudes-de-vie-et-prevention-des-maladies-chroniques/nutrition-activite-physique-et-problemes-lies-au-poids/portrait-de-l-environnement-bati-et-de-l-environnement-des-services/indice-de-defavorisation>



**Supplementary Table 5: Description of the 57 clinically relevant endophenotypes.**

These endophenotypes were selected to encompass most body systems that characterize health in adult humans. Only endophenotypes with sufficient individuals reporting the condition were included. Some lifestyle measures (alcohol consumption, smoking habits, daily vegetable intake) were also included to verify their possible correlation with region. None of those lifestyle habits are different across regions or environments.

| Endophenotype                 | Description                                                                   |
|-------------------------------|-------------------------------------------------------------------------------|
| Age                           | Age                                                                           |
| Alcohol consumption           | Healthy / Heavy                                                               |
| Allergy                       | Yes / No                                                                      |
| ALT (liver function)          | Alanine aminotransferase level                                                |
| AST (liver function)          | Aspartate aminotransferase level                                              |
| Asthma                        | Yes / No                                                                      |
| Augmentation index PH percent | Measure of wave reflection and arterial stiffness, measured with SphygmoCor   |
| BMI                           | Body mass index                                                               |
| Bone density                  | T-score bone density                                                          |
| Bronchitis                    | Yes / No                                                                      |
| Buckberg ratio                | Subendocardial viability ratio (index of myocardial oxygen supply and demand) |
| Cancer                        | Yes / No                                                                      |
| Central Augmentation Index    | Measure of wave reflection and arterial stiffness, measured with SphygmoCor   |
| Chronic Renal problem         | Yes / No                                                                      |
| Daily vegetables              | Good / Poor                                                                   |
| Diastolic BP                  | Diastolyic blood pressure                                                     |
| Ejection duration             | Duration of heart ventricular ejection                                        |

|                                 |                                                    |
|---------------------------------|----------------------------------------------------|
| Emphysema                       | Emphysema diagnostic - Yes or No                   |
| Eosinophils                     | Eosinophils counts                                 |
| Erythrocytes                    | Erythrocytes counts                                |
| Fat percent                     | Fat percent from body impedance                    |
| FEV1 to FVC ratio               | Spirometry                                         |
| Forced expiratory volume (FEV1) | Spirometry                                         |
| Forced vital capacity (FVC)     | Spirometry                                         |
| Gender                          | Male / Female                                      |
| GGT (liver function)            | Gamma-glutamyl transferase levels                  |
| HBA1C                           | Glycated heamoglobin levels                        |
| HDL                             | High density lipoprotein level                     |
| Heart                           | Heart problem diagnosed - Yes / No                 |
| Height                          | Height (cm)                                        |
| Hematocrit                      | Hematocrit blood levels                            |
| Hemoglobin                      | Hemoglobin blood levels                            |
| LDL                             | Low density lipoprotein                            |
| Leukocytes                      | Leukocytes counts                                  |
| Lung                            | Lung problem diagnosed - Yes / No                  |
| Lymphocytes                     | Lymphocytes counts                                 |
| Macular degeneration            | Yes / No                                           |
| Mean corpuscular volume         | Mean corpuscular volume                            |
| Mean CV conc                    | Mean corpuscular volume concentration              |
| Mean platelet volume            | Mean platelet volume                               |
| Monocytes                       | Monocytes counts                                   |
| # Chronic Diseases              | 1 to 5                                             |
| Neutrophils                     | Neutrophils counts                                 |
| Peripheral augmentation index   | Measure of wave reflection and arterial stiffness, |

|                             |                                                      |
|-----------------------------|------------------------------------------------------|
|                             | measured with SphygmoCor                             |
| Physical activity           | IPAQ score category                                  |
| Platelets                   | Platelets counts                                     |
| Red blood cell distribution | Red blood cell distribution width                    |
| Resting heart rate          | Heart rate at rest                                   |
| Skin                        | Skin problem diagnosed - Yes / No                    |
| Smoking status              | Yes, Past, Occasional, Never                         |
| Stiffness score             | Derived from pulse wave analysis (Low, medium, high) |
| Stroke                      | Yes / No                                             |
| Systolic BP                 | Systolic Blood pressure                              |
| T2 Diabetes                 | Yes / No                                             |
| T4 (Thyroid)                | T4 levels                                            |
| Triglycerides               | Triglycerides levels                                 |
| TSH (Thyroid)               | Thyroid stimulationg hormone levels                  |

---

**Supplementary Table 6: Differentially expressed genes between high and low SO<sub>2</sub> exposure are enriched in oxygen transport, chemokine activity, GPCR, and leukocyte migration pathways.**

We performed a GO term enrichment on the 170 differentially expressed genes between high and low SO<sub>2</sub> exposure.

| GO.ID      | Term                                         | pValue   |
|------------|----------------------------------------------|----------|
| GO:0019825 | oxygen binding                               | 1.09E-08 |
| GO:0005833 | hemoglobin complex                           | 1.65E-08 |
| GO:0070098 | chemokine-mediated signaling pathway         | 2.32E-07 |
| GO:0005344 | oxygen transporter activity                  | 8.95E-07 |
| GO:0015671 | oxygen transport                             | 2.21E-06 |
| GO:0045236 | CXCR chemokine receptor binding              | 4.81E-06 |
| GO:0007186 | G-protein coupled receptor signaling pathway | 7.14E-06 |
| GO:0015669 | gas transport                                | 9.52E-06 |
| GO:0005125 | cytokine activity                            | 2.99E-05 |
| GO:0008009 | chemokine activity                           | 4.99E-05 |
| GO:0030595 | leukocyte chemotaxis                         | 0.000107 |
| GO:0005615 | extracellular space                          | 0.000146 |
| GO:0060326 | cell chemotaxis                              | 0.000219 |
| GO:0009617 | response to bacterium                        | 0.000358 |
| GO:0042379 | chemokine receptor binding                   | 0.00092  |
| GO:0002687 | positive regulation of leukocyte migration   | 0.00122  |
| GO:0009605 | response to external stimulus                | 0.00213  |
| GO:0002685 | regulation of leukocyte migration            | 0.00313  |
| GO:0006954 | inflammatory response                        | 0.00379  |
| GO:0002688 | regulation of leukocyte chemotaxis           | 0.00428  |
| GO:0050900 | leukocyte migration                          | 0.00445  |

|            |                                             |         |
|------------|---------------------------------------------|---------|
| GO:0031091 | platelet alpha granule                      | 0.0057  |
| GO:0006935 | chemotaxis                                  | 0.00655 |
| GO:0042330 | taxis                                       | 0.00674 |
| GO:0032496 | response to lipopolysaccharide              | 0.01    |
| GO:0060205 | cytoplasmic membrane-bounded vesicle lumen  | 0.01    |
| GO:0031983 | vesicle lumen                               | 0.0115  |
| GO:0002690 | positive regulation of leukocyte chemotaxis | 0.0131  |
| GO:0005576 | extracellular region                        | 0.0153  |
| GO:0031224 | intrinsic component of membrane             | 0.0154  |
| GO:0004930 | G-protein coupled receptor activity         | 0.0156  |
| GO:0002237 | response to molecule of bacterial origin    | 0.0159  |
| GO:0016021 | integral component of membrane              | 0.0182  |
| GO:0043207 | response to external biotic stimulus        | 0.0253  |
| GO:0051707 | response to other organism                  | 0.0253  |
| GO:0045765 | regulation of angiogenesis                  | 0.0295  |
| GO:0020037 | heme binding                                | 0.0302  |
| GO:0009607 | response to biotic stimulus                 | 0.0493  |

---

**Supplementary Table 7: Multivariate models show that 14-day SO<sub>2</sub> air pollution contributes to modulating gene expression in 170 gene candidates, and not most covariates or underlying diseases.**

We tested for the contribution of several environmental variables (models 1,2 and 5,6) to variation in gene expression in the 170 candidates identified through differential gene expression analyses. We performed sensitivity analyses by restricting our samples to MTL-only, thereby reducing the possible effect of other variables associated with geography and regional ancestry. We also tested for the contribution of associated underlying diseases/phenotypic states (models 3 and 4) on gene expression variation. Models 5 and 6 (*diseases removed*) are performed on gene expression data from which the effects of FEV1, liver enzymes, lung diseases and arterial stiffness have been removed (significant phenotypes in Model 3). Details on phenotypes are given in Supplementary Table 5.

Significance levels: \*= $p < 0.05$ , \*\*= $p < 0.01$ , \*\*\*= $p < 0.001$ , \*\*\*\*= $p < 0.0001$ , \*\*\*\*\*= $p < 2.2 \times 10^{-16}$

|                           |                                                                                                                                                                                                                                                                                                   |
|---------------------------|---------------------------------------------------------------------------------------------------------------------------------------------------------------------------------------------------------------------------------------------------------------------------------------------------|
| Model 1                   | gene expression ALL SO <sub>2</sub> ** + O <sub>3</sub> ** + PM <sub>2.5</sub> + smoking + Population density* + greenness** + social deprivation + long term NO <sub>2</sub> + food desert + park density + street network + material deprivation* + walkability + long term PM <sub>2.5</sub>   |
| Model 2                   | gene expression MTL-only SO <sub>2</sub> ** + O <sub>3</sub> * + PM <sub>2.5</sub> + smoking + Population density + greenness* + social deprivation + long term NO <sub>2</sub> + food desert + park density + street network* + material deprivation + walkability + long term PM <sub>2.5</sub> |
| Model 1 and 2 replication | SO <sub>2</sub> + O <sub>3</sub> + greenness                                                                                                                                                                                                                                                      |
| Model 3                   | gene expression ALL Lung** + Asthma + AST*** + ALT*** + Arterial stiffness* FEV1*** + lymphocyte counts + monocyte counts + GGT*                                                                                                                                                                  |
| Model 4                   | gene expression MTL-only Lung + Asthma + AST + ALT + Arterial stiffness FEV1*** + lymphocyte counts + monocyte counts + GGT                                                                                                                                                                       |

|                           |                                                                                                                                                                                                                                                          |
|---------------------------|----------------------------------------------------------------------------------------------------------------------------------------------------------------------------------------------------------------------------------------------------------|
| Model 3 and 4 replication | FEV1                                                                                                                                                                                                                                                     |
| Model 5                   | gene expression <i>diseases removed</i> ALL SO2** + O3 + PM2.5 + smoking + Population density* + greenness*** + social deprivation + long term NO2 + food desert + park density + street network + material deprivation* + walkability + long term PM2.5 |
| Model 6                   | gene expression <i>diseases removed</i> MTL-only SO2** + O3 + PM2.5 + smoking + Population density + greenness + social deprivation + long term NO2 + food desert + park density + street network + material deprivation + walkability + long term PM2.5 |
| Model 5 and 6 replication | SO2                                                                                                                                                                                                                                                      |

**Supplementary Table 8: Canonical eQTLs in large scale studies replicate in CARTaGENE.**

Features identified in canonical eQTLs (eSNPs, SNP-gene pairs, eGenes) in other large scale studies (Geuvadis, Hap Map, and GTEx (blood)) replicate with high proportion in CARTaGENE French-Canadians. The highest replication rate is achieved with whole blood samples from GTEx. The other two studies were based on cell lines. Numbers are percents of replication.

| <b>Feature</b> | <b>Geuvadis</b> | <b>Hap Map</b> | <b>GTEx-blood</b> |
|----------------|-----------------|----------------|-------------------|
| eSNPs          | 86.9            | 77.6           | 96.3              |
| SNP-gene pairs | 78.6            | 69.7           | 93.6              |
| eGenes         | 78              | 64.7           | 93.8              |



### Supplementary Table 9: Interaction env-eQTLs

Replicated eSNP-eGene pairs of env-eQTLs in discovery and replication cohorts, and in the combined dataset. All entries are significant (q-value<0.05; see Material and Methods) with the same direction of effect in both the discovery and replication cohorts, and remain significant through empirical estimation of p-values using permutation in the combined cohort.

| eSNP       | Effect Allele | MAF     | eGene   | Pollutant | Discovery (n=416) |       |          | Replication (n=417) |       |         | Combined (n=833) |       |         |                                  |
|------------|---------------|---------|---------|-----------|-------------------|-------|----------|---------------------|-------|---------|------------------|-------|---------|----------------------------------|
|            |               |         |         |           | Effect Size       | SE    | p-value  | Effect Size         | SE    | p-value | Effect Size      | SE    | p-value | Empirical p-value (permutations) |
| rs10156534 | G             | 0.29530 | SMARCA2 | NO2       | -1.770            | 0.276 | 3.42e-10 | -0.235              | 0.081 | 0.0035  | -0.890           | 0.425 | 0.0364  | 0.002                            |
| rs62518566 | G             | 0.07576 | ATAD2   | NO2       | 1.021             | 0.153 | 7.98e-11 | 0.469               | 0.163 | 0.0035  | 0.519            | 0.248 | 0.0369  | 0.005                            |
| rs12537122 | A             | 0.07384 | ZP3     | PM25      | 0.566             | 0.109 | 3.13e-7  | 0.587               | 0.169 | 0.0006  | 0.293            | 0.097 | 0.0013  | 0.035                            |
| rs62518566 | A             | 0.07576 | ATAD2   | SO2       | -1.804            | 0.278 | 3.94e-10 | -0.455              | 0.155 | 0.0035  | -0.914           | 0.425 | 0.0316  | 0.001                            |

## Supplementary references

1. *10 years of data from the national air pollution surveillance (NAPS) network.* (Government of Canada, 2013).
2. Wood, J. *Canadian Environmental Indicators - Air Quality.* (Fraser Institute, 2012).
3. Beecham, G. W. *et al.* PARK10 is a major locus for sporadic neuropathologically confirmed Parkinson disease. *Neurology* **84**, 972–980 (2015).
4. Ciró, M. *et al.* ATAD2 is a novel cofactor for MYC, overexpressed and amplified in aggressive tumors. *Cancer Res.* **69**, 8491–8498 (2009).
5. Wu, G. *et al.* Epigenetic high regulation of ATAD2 regulates the Hh pathway in human hepatocellular carcinoma. *Int. J. Oncol.* **45**, 351–361 (2014).
6. Battle, A. *et al.* Characterizing the genetic basis of transcriptome diversity through RNA-sequencing of 922 individuals. *Genome Res.* **24**, 14–24 (2014).
7. Zhao, J. *et al.* A Burden of Rare Variants Associated with Extremes of Gene Expression in Human Peripheral Blood. *Am. J. Hum. Genet.* **98**, 299–309 (2016).
